# Supplementary material for: The microbiota maintain homeostasis of liver-resident γδT-17 cells in a lipid antigen/CD1d-dependent manner
Source: PubMed Central journal article supplement (PMC5227332; doi:10.1038/ncomms13839), 2017-01-09
Supplement: ncomms13839-s1.pdf [file ncomms13839-s1.pdf]

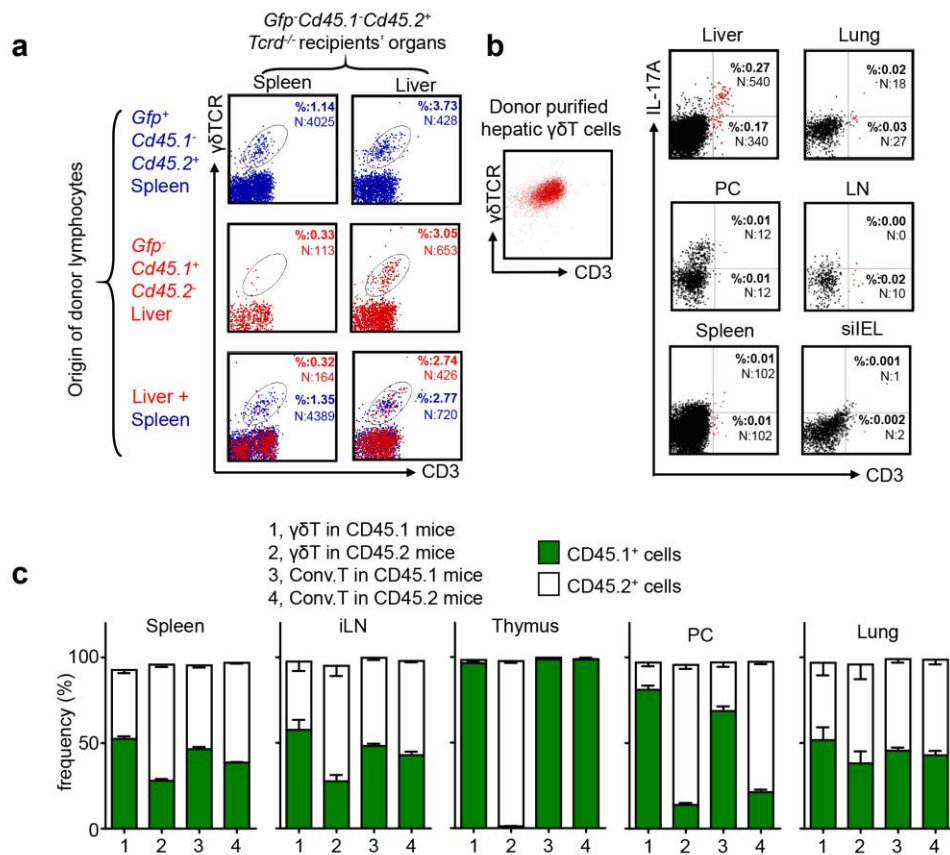

**Supplementary Figure 1: Traffic and residency of  $\gamma\delta$ T cells, related to Figure 1.** (a) *Gfp*<sup>+</sup>*Cd45.1*<sup>-</sup>*Cd45.2*<sup>+</sup> splenic and *Gfp*<sup>-</sup>*Cd45.1*<sup>+</sup>*Cd45.2*<sup>-</sup> hepatic lymphocytes ( $3 \times 10^6$ ) were intravenously (*i.v.*) transferred into *Gfp*<sup>-</sup>*Cd45.1*<sup>-</sup>*Cd45.2*<sup>+</sup> *Tcrd*<sup>-/-</sup> recipient mice either separately or together. The number (N) and frequency (%) of  $\gamma\delta$ T cells among all the lymphocytes from the same donor (blue for *Gfp*<sup>+</sup>*Cd45.1*<sup>-</sup>*Cd45.2*<sup>+</sup> splenic cells, red for *Gfp*<sup>-</sup>*Cd45.1*<sup>+</sup>*Cd45.2*<sup>-</sup> hepatic cells) were evaluated by FACS 24 hours later. (b) MACS-purified hepatic  $\gamma\delta$ T cells ( $3 \times 10^5$ ) were *i.v.* transferred into *Rag1*<sup>-/-</sup> mice, and the  $\gamma\delta$ T-17 cell (CD3<sup>+</sup> $\gamma\delta$ TCR<sup>+</sup>IL-17A<sup>+</sup>) numbers (N) and frequency (%) within total lymphocytes (CD45<sup>+</sup>) in the recipient organs were detected by FACS 24 hours later. (c) The host origin (CD45.1<sup>+</sup> or CD45.2<sup>+</sup>) of  $\gamma\delta$ T (CD3<sup>+</sup>TCR $\gamma\delta$ <sup>+</sup>) and conventional T (CD3<sup>+</sup>TCR $\gamma\delta$ <sup>-</sup>NK1.1<sup>-</sup>) cells was identified by FACS analysis in each mouse of the CD45.1/CD45.2 parabiotic B6 mouse pairs at 14 days post-surgery (n=4 pairs). The data are representative of 3 independent experiments. Either a representative plot or the mean  $\pm$  SEM is shown (\**P* < 0.05; \*\**P* < 0.01, \*\*\**P* < 0.001).

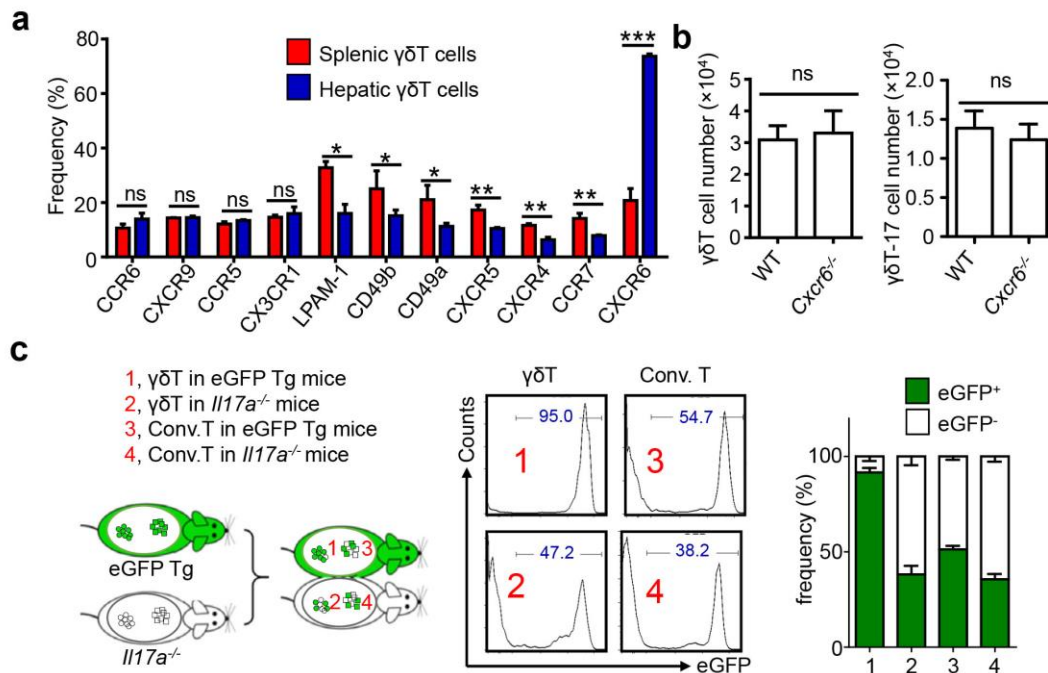

**Supplementary Figure 2: Chemokine receptor profile of hepatic  $\gamma\delta$ T cells, related to Figure 1.** (a) FACS analysis of homing-associated molecules expressed on  $\gamma\delta$ T cells from the liver and spleen. CXCR6 was indicated by GFP expression using CXCR6<sup>gfp/+</sup> mice (n=3/group). (b) The hepatic  $\gamma\delta$ T cell number and  $\gamma\delta$ T-17 cell number in WT mice and *Cxcr6*<sup>-/-</sup> mice were detected by FACS (n=5/group). (c) The host origin (eGFP<sup>+</sup> or eGFP<sup>-</sup>) of hepatic  $\gamma\delta$ T (CD3<sup>+</sup>TCR $\gamma\delta$ <sup>+</sup>) and conventional T (CD3<sup>+</sup>TCR $\gamma\delta$ <sup>-</sup>NK1.1<sup>-</sup>) cells was identified by FACS analysis in each mouse of the eGFP Tg/*Il17a*<sup>-/-</sup> parabiotic B6 mouse pairs at 14 days post-surgery (n=4 pairs). The data are representative of 3 independent experiments. Either a representative plot or the mean  $\pm$  SEM is shown (\**P* < 0.05; \*\**P* < 0.01, \*\*\**P* < 0.001).

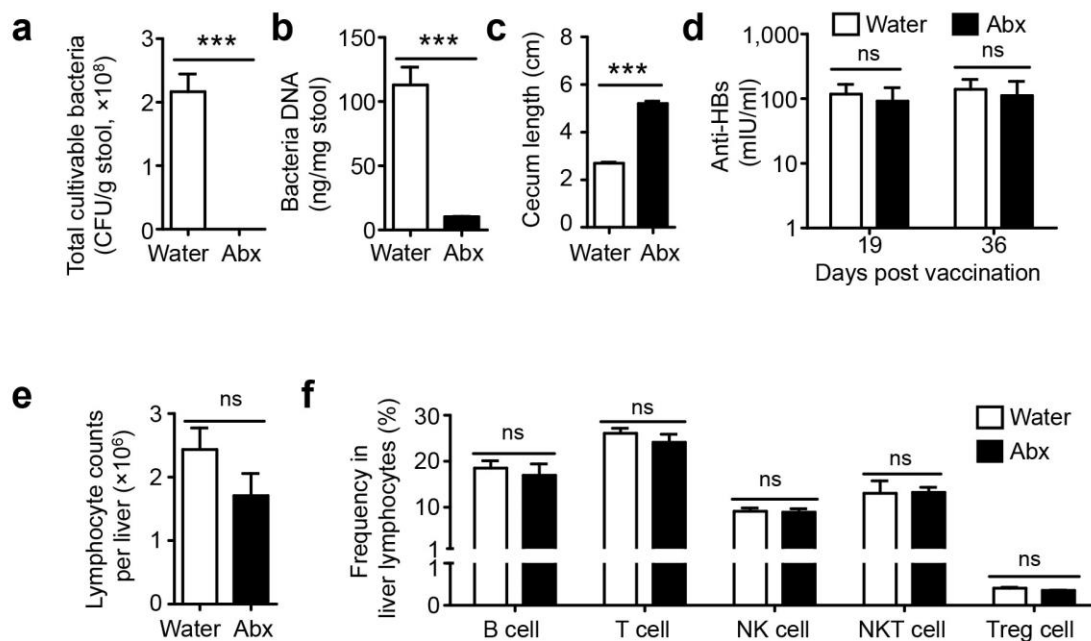

**Supplementary Figure 3. Mouse model of antibiotic-mediated commensal clearance, related to Figure 2.** Five-week-old B6 mice were fed water alone (Water) or containing antibiotics (Abx) for 4 weeks. **(a)** Total cultivable bacteria in fresh stool were planted and counted on blood agar plates. **(b)** Global stool bacterial DNA was extracted and calculated. **(c)** The cecum length was evaluated. **(d)** Mice were immunized with 50  $\mu$ g of the HBsAg vaccine twice at 2-week intervals, and serum anti-HBs levels were detected by radioimmunoassay (RIA) at 19 and 36 days post-vaccination. **(e)** The total number and **(f)** composition of hepatic lymphocytes were evaluated by FACS (B, CD3<sup>-</sup>CD19<sup>+</sup>; T, CD3<sup>+</sup>NK1.1<sup>-</sup>TCR $\gamma\delta$ <sup>-</sup>; NK, CD3<sup>+</sup>NK1.1<sup>+</sup>; NKT, CD3<sup>+</sup>NK1.1<sup>+</sup>TCR $\gamma\delta$ <sup>-</sup>; Treg, CD3<sup>+</sup>CD4<sup>+</sup>Foxp3<sup>+</sup>). The data are representative of 3 independent experiments and presented as the mean  $\pm$  SEM (n = 5/group) (\*\* $P$  < 0.01, \*\*\* $P$  < 0.001).

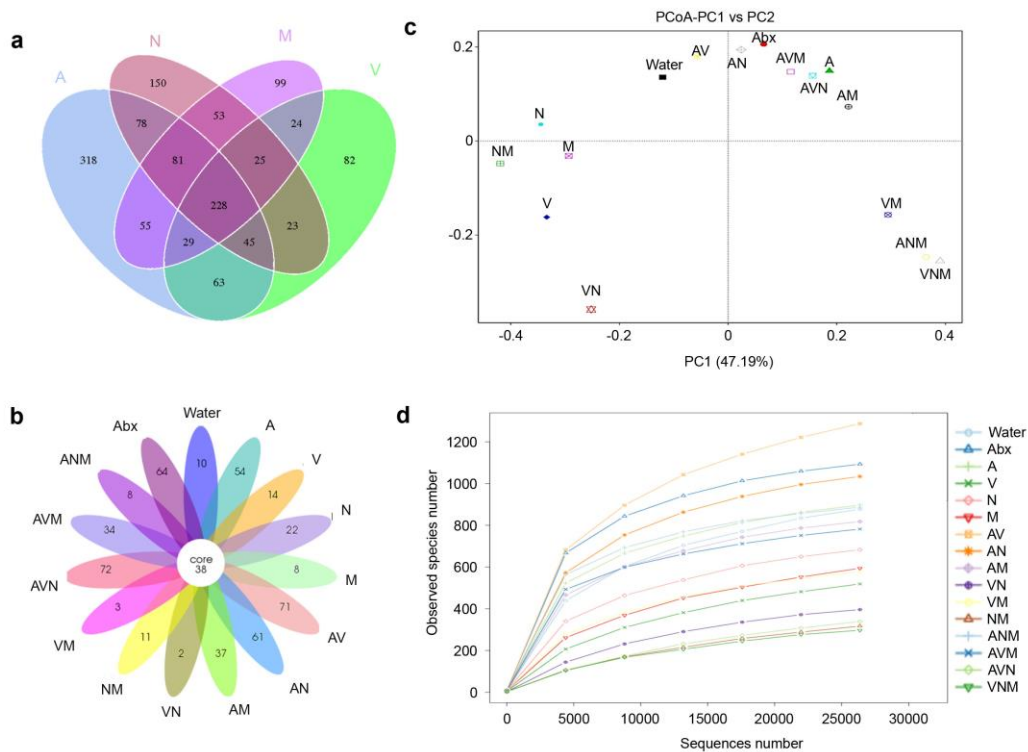

**Supplementary Figure 4. Commensal characteristics of mice treated with different antibiotics, related to Figure 3.** Mice were treated as described in Figure 3. Genomic bacterial DNA was isolated from fecal samples, and the V5-V6 hypervariable region of 16S rDNA was amplified and sequenced. **(a, b)** Venn diagram **(a)** or Petal diagram **(b)** showing the overlap and specificity of bacterial species in different antibiotic-treated mice. The number of OTU reads is shown. **(c)** Discrimination of mouse groups based on microbial composition. Scatter plot scores of the principal coordinate analysis (PCoA) of microbial profiles are shown. **(d)** The rarefaction curve of the OTUs in each group.

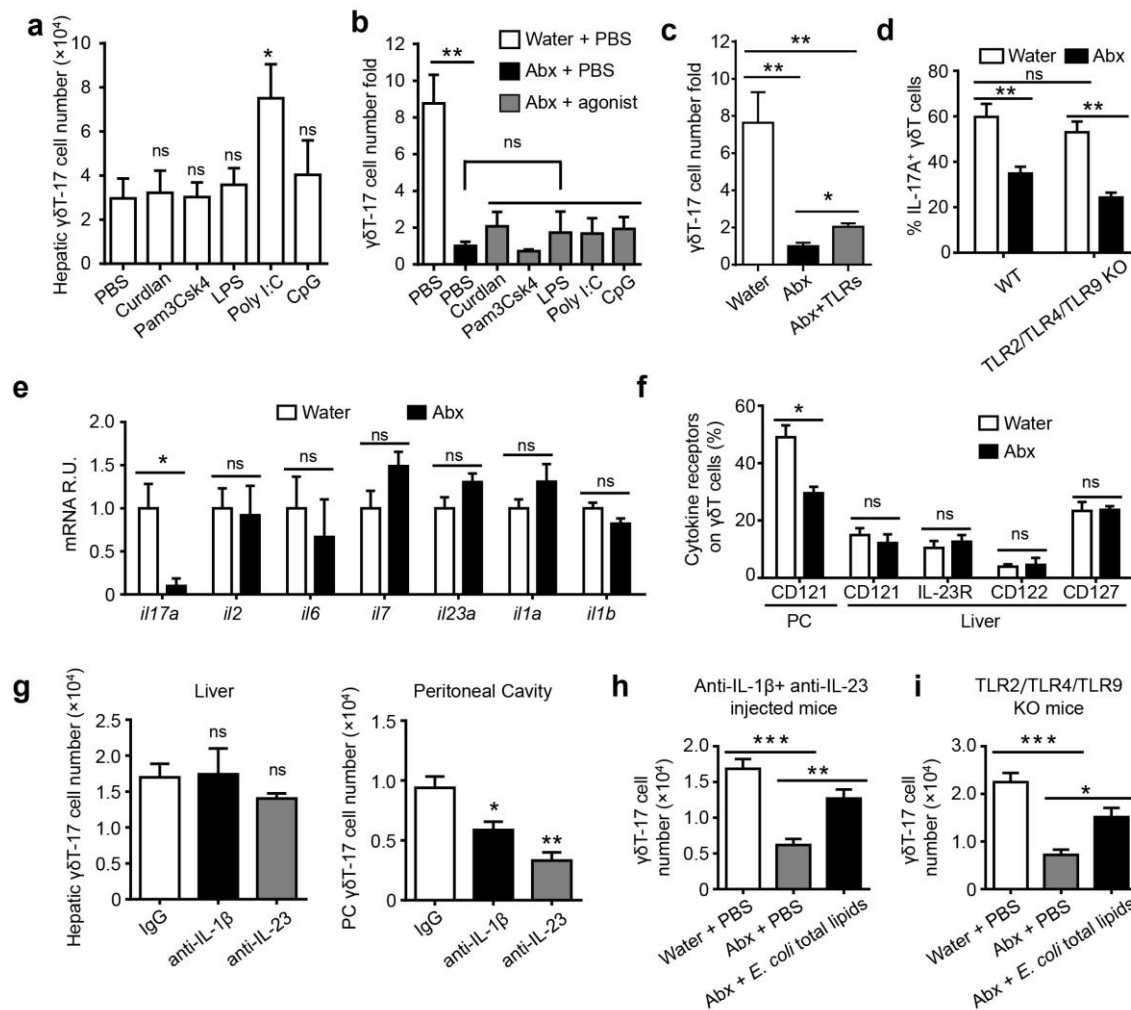

**Supplementary Figure 5. The reduction of hepatic  $\gamma\delta$ T-17 cells in Abx-treated mice is independent of PAMPs and cytokine signals, related to Figure 5.** Five-week-old B6 mice were fed water alone (Water) or containing antibiotics (Abx) for 4 weeks. **(a, b)** Water-fed mice **(a)** and Abx-treated mice **(b)** were *i.p.* injected with 50  $\mu$ g curdlan, 50  $\mu$ g Pam3csk4, 100  $\mu$ g LPS, 100  $\mu$ g poly(I:C) or 50  $\mu$ g CpG. Hepatic  $\gamma\delta$ T-17 cells were evaluated by FACS one day later, and the cell numbers **(a)** and fold increase of the cell number compared with Abx-treated mice receiving PBS **(b)** are shown ( $n=4$ /group). **(c)** Abx-treated mice were *i.v.* injected with 50  $\mu$ g Pam3csk4, 10  $\mu$ g LPS and 50  $\mu$ g CpG 3 times on days 0, 3 and 6. Hepatic  $\gamma\delta$ T-17 cells were evaluated by FACS on day 8, and the cell number fold change compared with Abx-treated mice receiving PBS is shown ( $n=5, 4, 5$ ). **(d)** Co-housed WT mice and TLR2/TLR4/TLR9 triple-knockout mice were treated with antibiotics for 4 weeks, and the frequency of hepatic  $\gamma\delta$ T-17 cells was evaluated by FACS ( $n=5$ /group). **(e)** *Il17a*, *Il2*, *Il6*, *Il7*, *Il23*, *Il1a* and *Il1b* mRNA expression in the livers of Water- and Abx-treated mice were evaluated by RT-PCR ( $n=5, 4$ ). **(f)** IL-23R, CD122, CD127 and CD121 expression levels on liver and PC  $\gamma\delta$ T cells from WT and Abx-treated mice were evaluated by FACS ( $n=5, 4$ ). **(g)** B6 mice were *i.v.* injected with 50  $\mu$ g control IgG, anti-IL-1 $\beta$  or anti-IL-23 antibody twice at 3-day intervals, and hepatic and PC  $\gamma\delta$ T-17 cells were analyzed by FACS 3 days after the last injection ( $n=4, 5, 4$ ). **(h, i)** Antibody-injected mice (50  $\mu$ g anti-IL-1 $\beta$  and 50  $\mu$ g anti-IL-23, once per week) **(h)** and TLR2/TLR4/TLR9 triple-knockout mice **(i)** were treated with antibiotics or untreated, and Abx-treated mice were then *i.p.* injected with 50  $\mu$ g total *E. coli* polar lipid extract 6 times at 2-day intervals. The hepatic  $\gamma\delta$ T-17 cell numbers were evaluated by FACS ( $n=4$ /group). The data are representative of 3 independent experiments and are presented as the mean  $\pm$  SEM (\* $P < 0.05$ ; \*\* $P < 0.01$ ).

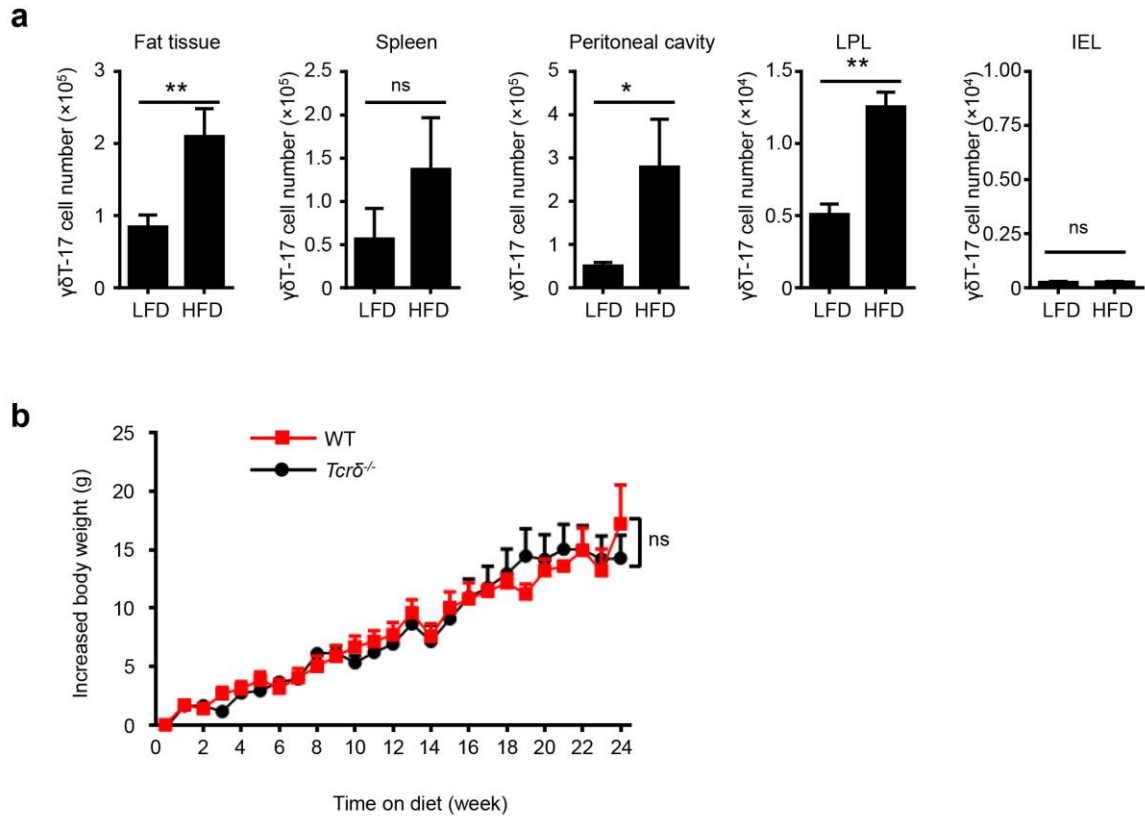

**Supplementary Figure 6.  $\gamma\delta$ T-17 cell accumulation and body weight increase of HFD mice, related to Figure 7.** WT and *Tcr* $\delta^{-/-}$  mice were placed on an HFD for 24 weeks. (a) The  $\gamma\delta$ T-17 cell numbers in the fat tissue, spleens, peritoneal cavities, lamina propria lymphocytes (LPLs) and intraepithelial lymphocytes (IELs) were detected by FACS (n=4, 5). (b) Increased body weight of HFD-fed WT mice and *Tcr* $\delta^{-/-}$  mice (n=5/group). The data are representative of 3 independent experiments and shown by the mean  $\pm$  SEM (\*p < 0.05; \*\*p < 0.01).

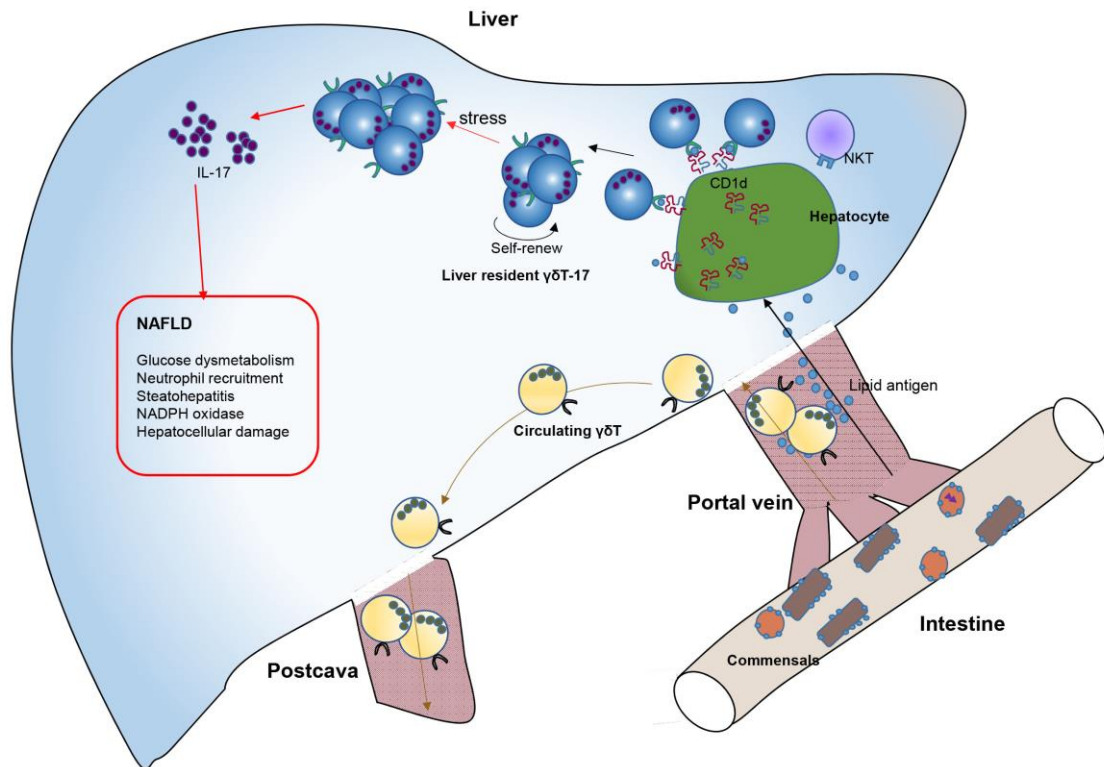

**Supplementary Figure 7. Schematic diagram of microbiota-promoted liver-resident  $\gamma\delta$ T-17 cells.** Microbiota/*E. coli* lipid antigens reach the liver through the portal vein. Then, they will be presented by CD1d expressed on hepatocytes to  $\gamma\delta$ TCR, which induces the activation, anti-apoptosis and proliferation of hepatic  $\gamma\delta$ T cells. These self-renewing hepatic  $\gamma\delta$ T cells are resident in the liver and cannot be replaced by circulating  $\gamma\delta$ T cells. The liver-resident  $\gamma\delta$ T cells predominantly express IL-17A. More importantly, under stress conditions, liver-resident  $\gamma\delta$ T-17 cells expand and produce high levels of IL-17A, which then accelerate NAFLD. If the microbiota are depleted, liver-resident  $\gamma\delta$ T-17 cells sharply reduce and skew the outcome of this pathological process. Thus, liver-resident  $\gamma\delta$ T-17 cells link the microbiota to shape the liver immune response.

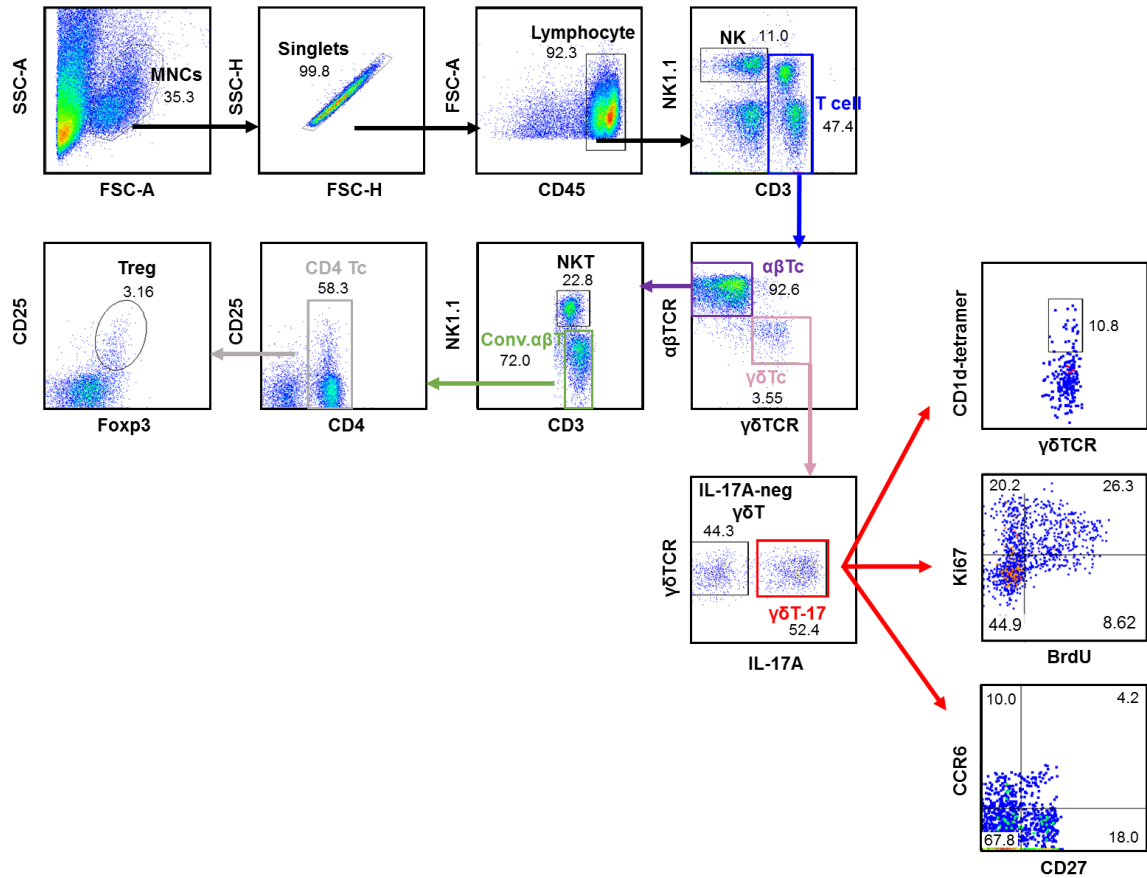

**Supplementary Figure 8. Flow cytometry gating strategy, related to Methods.** MNCs, mononuclear cell; NK, natural killer cell; αβTc, αβT cell; γδTc, γδT cell; NKT, natural killer T cell; Conv. αβTc, conventional αβT cell; CD4 Tc, CD4 T cell; Treg, regulatory T cell; γδT-17, IL-17 secreted γδT cells.



**Supplementary Table 1.** Anti-mouse monoclonal antibodies for flow cytometry and *in vivo* neutralization.

| Fluorescence | Antigen            | Clone         | Company     | Catalog number | Isotype control       | Dilution |
|--------------|--------------------|---------------|-------------|----------------|-----------------------|----------|
| FITC         | CD19               | 1D3           | BD          | 557398         | Rat IgG2a, $\kappa$   | 1:200    |
| FITC         | CD25               | 7D4           | BD          | 553072         | Rat IgM, $\kappa$     | 1:200    |
| FITC         | CD27               | LG.7F9        | eBioscience | 11-0271        | ArH IgG               | 1:200    |
| FITC         | CD62L              | MEL-14        | BD          | 553150         | Rat IgG2a, $\kappa$   | 1:200    |
| FITC         | TCR $\gamma\delta$ | GL3           | eBioscience | 11-5711        | ArH IgG               | 1:200    |
| FITC         | CD122              | TM- $\beta$ 1 | BD          | 553361         | Rat IgG2b, $\kappa$   | 1:100    |
| FITC         | CD8 $\alpha$       | 53-6.7        | BD          | 553031         | Rat IgG2a, $\kappa$   | 1:200    |
| FITC         | CXCR4              | 2B11          | BD          | 551967         | Rat IgG2b, $\kappa$   | 1:200    |
| FITC         | CD49b              | DX5           | BD          | 553857         | Rat IgM, $\kappa$     | 1:200    |
| PE           | Biotin             | ID4-C5        | BioLegend   | 409003         | Ms IgG2a, $\kappa$    | 1:200    |
| PE           | CD4                | RM4-5         | BD          | 553049         | Rat IgG2a, $\kappa$   | 1:100    |
| PE           | CD45.1             | A20           | BD          | 553776         | Ms IgG2a, $\kappa$    | 1:200    |
| PE           | IL-17              | TC11-18H10    | BD          | 559502         | Rat IgG1, $\kappa$    | 1:200    |
| PE           | TCR $\gamma\delta$ | GL3           | BD          | 553178         | ArH IgG2, $\kappa$    | 1:200    |
| PE           | CD121              | 35F5          | BD          | 557489         | Rat IgG1, $\kappa$    | 1:200    |
| PE           | CD127              | SB/199        | BioLegend   | 121111         | Rat IgG2b, $\kappa$   | 1:200    |
| PE           | CCR6               | 29-2L17       | BioLegend   | 129804         | ArH IgG               | 1:100    |
| PE           | TCRV $\gamma$ 2    | UC3-10A6      | BioLegend   | 137706         | ArH IgG               | 1:200    |
| PE           | CCR5               | HM-CCR5       | BioLegend   | 107005         | ArH IgG               | 1:200    |
| PE           | CCR9               | 9B1           | BioLegend   | 129705         | Rat IgG2a, $\kappa$   | 1:200    |
| PE           | CX3CR1             | SA011F11      | BioLegend   | 149005         | Ms IgG2a, $\kappa$    | 1:200    |
| PE           | CD49a              | Ha31/8        | BD          | 562115         | ArH IgG2, $\lambda$ 1 | 1:200    |
| PE           | LPAM-1             | DATK32        | eBioscience | 12-5887        | Rat IgG2a, $\kappa$   | 1:200    |
| PerCp-CY5.5  | Foxp3              | FJK-16s       | eBioscience | 45-5773        | Rat IgG2a, $\kappa$   | 1:200    |
| PerCp-CY5.5  | CD3e               | 145-2C11      | BD          | 551163         | ArH IgG1, $\kappa$    | 1:200    |
| PerCp-CY5.5  | IL-17a             | TC11-18H10.1  | BioLegend   | 506920         | Rat IgG1, $\kappa$    | 1:200    |
| PerCp-CY5.5  | CD127              | A7R34         | BioLegend   | 135021         | Rat IgG2a, $\kappa$   | 1:200    |
| PerCp-CY5.5  | CD24               | M1/69         | BioLegend   | 101823         | Rat IgG2b, $\kappa$   | 1:200    |
| PerCp-CY5.5  | CD45.2             | 104           | BD          | 552950         | Ms IgG2a, $\kappa$    | 1:200    |
| PerCp-CY5.5  | CXCR5              | L138D7        | BioLegend   | 145508         | Rat IgG2b, $\kappa$   | 1:200    |
| PerCp-CY5.5  | CCR7               | 4B12          | eBioscience | 45-1971        | Rat IgG2a, $\kappa$   | 1:200    |
| PE-CY7       | NK1.1              | PK136         | BD          | 552878         | Ms IgG2a, $\kappa$    | 1:200    |
| PE-CY7       | CD45.1             | A20           | BD          | 560578         | Ms IgG2a, $\kappa$    | 1:200    |
| PE-CY7       | IFN- $\gamma$      | XMG1.2        | BD          | 557649         | Rat IgG1, $\kappa$    | 1:400    |
| APC          | Gr-1               | RB6-8C5       | BD          | 553129         | Rat IgG2b, $\kappa$   | 1:200    |
| APC          | TCRV $\gamma$ 1.1  | 2.11          | BioLegend   | 141108         | ArH IgG               | 1:200    |
| APC          | TCR $\gamma\delta$ | eBioGL3       | eBioscience | 17-5711        | ArH IgG               | 1:200    |
| Alexa 647    | IL-17A             | TC11-18H10    | BD          | 560184         | Rat IgG1, $\kappa$    | 1:200    |
| Alexa 647    | Ki67               | SolA15        | eBioscience | 51-5698        | Rat IgG2a             | 1:400    |
| APC-CY7      | CD3e               | 145-2C11      | BD          | 557596         | AH IgG1, $\kappa$     | 1:200    |
| APC-CY7      | CD4                | GK1.5         | BD          | 552051         | Rat IgG2b, $\kappa$   | 1:200    |

|            |              |          |           |        |                     |       |
|------------|--------------|----------|-----------|--------|---------------------|-------|
| APC-CY7    | CD11b        | M1/70    | BD        | 557657 | Rat IgG2b, $\kappa$ | 1:200 |
| Functional | IL-1 $\beta$ | B122     | BioLegend | 503504 | ArH IgG             | NA    |
| Functional | IL-23(P19)   | MMp 19B2 | BioLegend | 513806 | Ms IgG2b, $\kappa$  | NA    |
| Functional | ArH IgG      | HTK888   | BioLegend | 400916 | ArH IgG             | NA    |

**Supplementary Table 2.** Primers for RT-PCR.

| <b>Gene</b>    | <b>Forward (5'-3')</b> | <b>Reverse (5'-3')</b>  |
|----------------|------------------------|-------------------------|
| <i>il17a</i>   | GGCTGACCCCTAAGAAACC    | CTGAAAATCAATAGCACGAAC   |
| <i>il2</i>     | AACCTGAAACTCCCCAGGAT   | TCATCGAATTGGCACTCAA     |
| <i>il6</i>     | AACGATGATGCACTTGCAGA   | GGAAATTGGGGTAGGAAGGA    |
| <i>il7</i>     | AGAGTGTACTGATGATCAGC   | GCAGTTCACCAGTGTTTGTG    |
| <i>il23a</i>   | CCAGCGGGACATATGAATCT   | AGGCTCCCCTTTGAAGATGT    |
| <i>il1a</i>    | GCAACGGGAAGATTCTGAAG   | TGACAAACTTCTGCCTGACG    |
| <i>il1b</i>    | GACCTTCCAGGATGAGGACA   | AGGCCACAGGTATTTTGTGCG   |
| <i>actin</i>   | TGACGTTGACATCCGTAAGACC | CTCAGGAGGAGCAATGATCTTGA |
| <i>p67phox</i> | CTATCAGCTGGTCCCACGA    | GCAGTGGCCTACTTCCAGAG    |
| <i>p47phox</i> | ATGACCTCAATGGCTTCACC   | CTATCTGGAGCCCCTTGACA    |
| <i>p22phox</i> | CCTGCSGCGATAGAGTAGGC   | TCATGGGGCAGATCGAGT      |
| <i>Nox2</i>    | CGGTGTGCAGTGCTATCATC   | GCTCTCCTTTCTCAGGGGTT    |
